# Supplementary material for: Enhanced photocatalytic H2 production on hierarchical rutile TiO2 microspheres
Source: Royal Society of Chemistry journal article supplement (doi:10.1039/c3ra22923h), 2013-01-01
Supplement: c3ra22923h.pdf [file c3ra22923h.pdf]

## Supporting Information

### Enhanced photocatalytic H<sub>2</sub> production on hierarchical rutile TiO<sub>2</sub> microspheres

*Shaoying Wang,<sup>a</sup> Zhaoke Zheng,<sup>a</sup> Baibiao Huang,<sup>\*a</sup> Zeyan Wang,<sup>a</sup> Yuanyuan Liu,<sup>a</sup>*

*Xiaoyan Qin,<sup>a</sup> Xiaoyang Zhang,<sup>a</sup> and Ying Dai<sup>b</sup>*

<sup>a</sup>State Key Lab of Crystal Materials Shandong University, Jinan 250100, P. R. China

<sup>b</sup>School of Physics Shandong University, Jinan 250100, P. R. China

\*Corresponding Author E-mail: [bbhuang@sdu.edu.cn](mailto:bbhuang@sdu.edu.cn). Fax: (+86) 0531-8836-5969

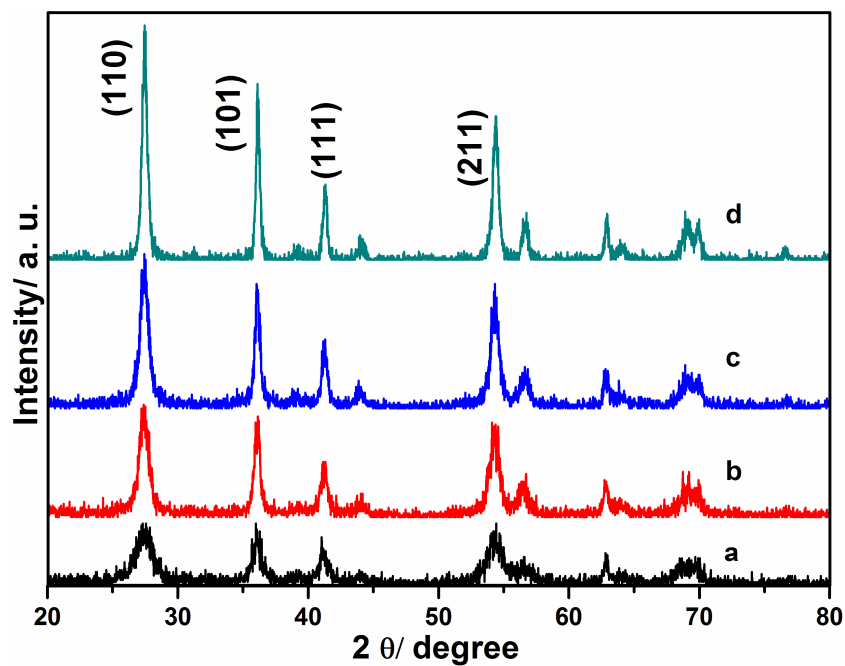

**Fig. S1.** XRD patterns of TiO<sub>2</sub> microspheres synthesized at 200 °C for different reaction time: (a) 1 h; (b) 6 h; (c) 12 h; (d) 24 h.

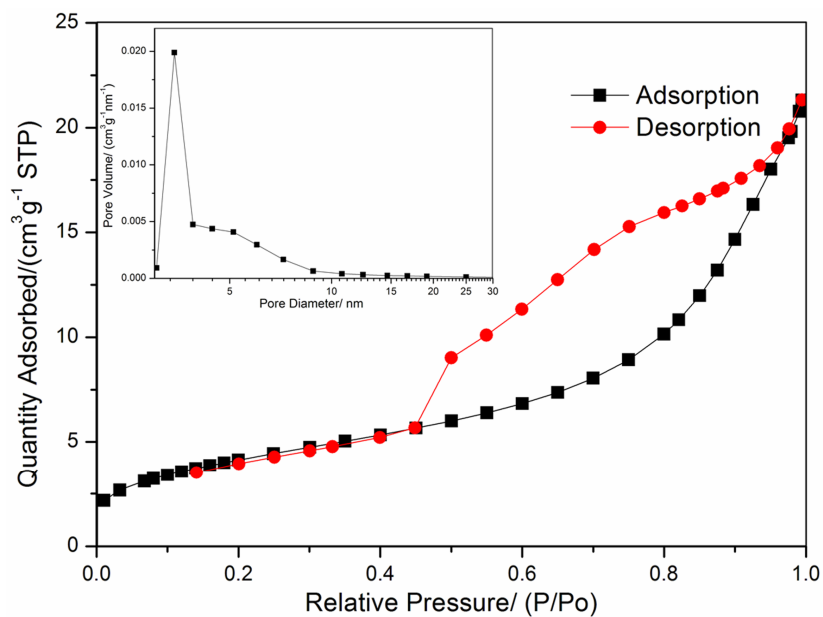

**Fig. S2.** Typical nitrogen adsorption-desorption isotherm of the rutile TiO<sub>2</sub> microspheres. The inset shows the corresponding pore-size distribution.

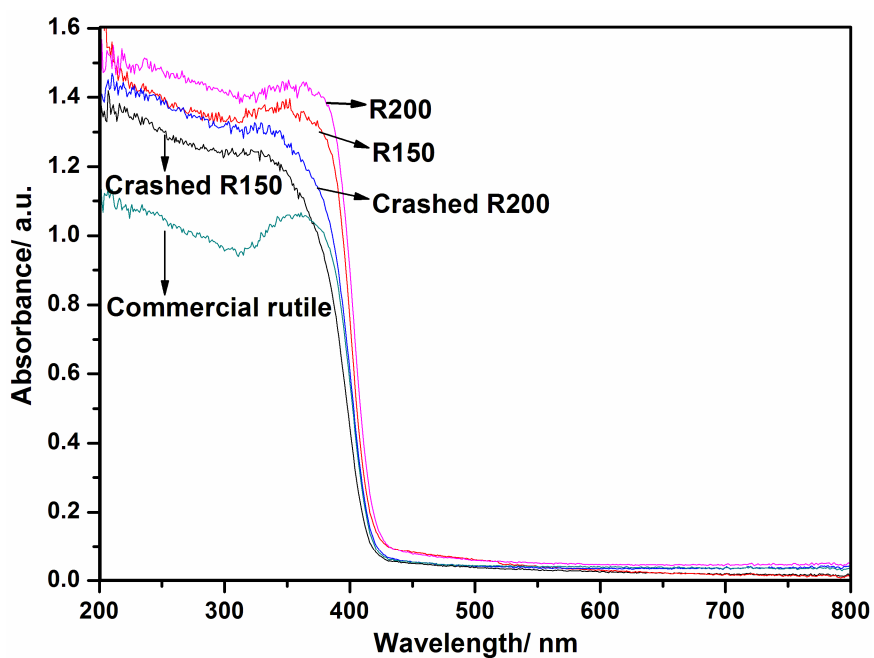

Fig. S3. UV/vis diffuse reflectance spectra of the prepared samples, corresponding crashed ones and commercial rutile.

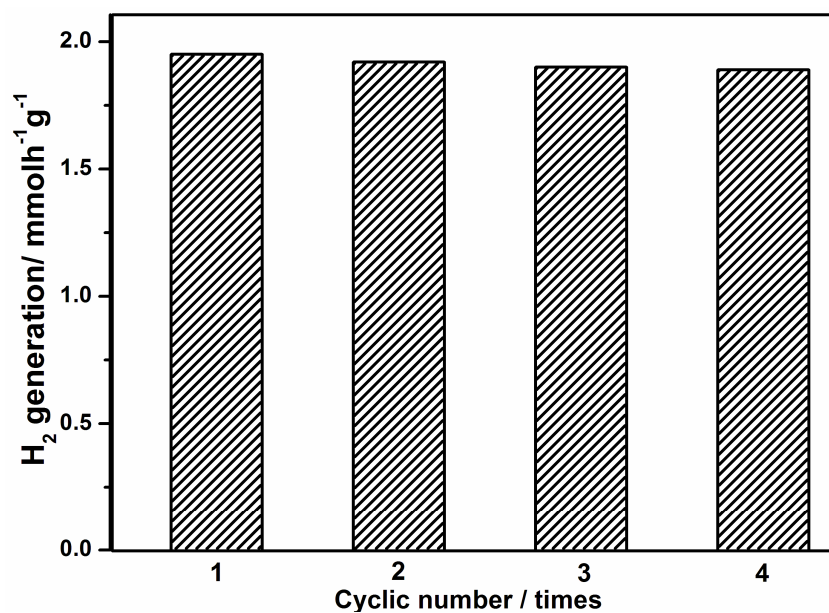

Fig. S4. Hydrogen evolution rate of R200 in the cyclic test.

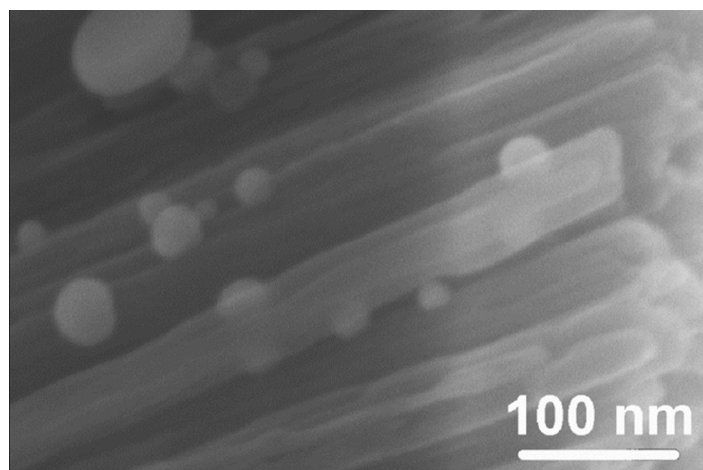

**Fig. S5.** SEM image of Ag-loaded microspheres prepared at 200 °C.
